# Supplementary material
Source: ML conference proceedings conference paper supplement (https://proceedings.neurips.cc/paper_files/paper/2014/hash/6e2713a6efee97bacb63e52c54f0ada0-Abstract.html)
Supplement: Supplementary file [file 6e2713a6efee97bacb63e52c54f0ada0-Supplemental.zip]

## Supplementary Material – Mind the Nuisance: Gaussian Process Classification using Privileged Noise

Table 1: Error rate performance on the AwA dataset over 100 repeated experiments. **SURF** image features as the **original** domain and **DeCAF** deep neural network image features as the **privileged** domain. The best methods for each binary task is highlighted in boldface.

|                        | GPC               | GPC+ (Ours)       | SVM              | SVM+              |
|------------------------|-------------------|-------------------|------------------|-------------------|
| Chimp. v. Panda        | 15.93±0.15        | <b>15.86±0.15</b> | 16.90±0.15       | 16.22±0.14        |
| Chimp. v. Leopard      | 14.74±0.13        | <b>14.69±0.12</b> | 15.28±0.15       | 15.10±0.12        |
| Chimp. v. Cat          | 16.63±0.12        | <b>16.52±0.11</b> | 17.34±0.11       | 16.97±0.11        |
| Chimp. v. Pig          | 19.82±0.23        | <b>19.48±0.26</b> | 20.52±0.27       | 20.04±0.25        |
| Chimp. v. Hippo.       | 18.99±0.11        | <b>18.67±0.11</b> | 19.57±0.11       | 19.20±0.11        |
| Chimp. v. Whale        | <b>5.72±0.08</b>  | 5.79±0.08         | 6.22±0.11        | 5.85±0.10         |
| Chimp. v. Raccoon      | <b>19.60±0.13</b> | 19.65±0.13        | 20.03±0.14       | 19.86±0.13        |
| Chimp. v. Rat          | 19.94±0.27        | <b>19.79±0.26</b> | 21.53±0.30       | 20.45±0.27        |
| Chimp. v. Seal         | 14.10±0.12        | <b>14.01±0.12</b> | 14.94±0.12       | 14.34±0.13        |
| Panda v. Leopard       | <b>14.19±0.12</b> | 14.26±0.13        | 14.85±0.15       | 14.59±0.15        |
| Panda v. Cat           | <b>12.96±0.12</b> | 12.99±0.12        | 14.26±0.13       | 13.52±0.13        |
| Panda v. Pig           | 20.23±0.23        | <b>20.17±0.22</b> | 22.54±0.29       | 20.85±0.24        |
| Panda v. Hippo.        | 15.47±0.12        | <b>15.45±0.13</b> | 16.89±0.17       | 15.70±0.14        |
| Panda v. Whale         | 5.00±0.09         | 5.20±0.09         | 5.73±0.11        | <b>4.95±0.09</b>  |
| Panda v. Raccoon       | <b>17.03±0.13</b> | 17.04±0.13        | 18.37±0.18       | 17.54±0.14        |
| Panda v. Rat           | <b>17.09±0.24</b> | 17.27±0.23        | 20.06±0.30       | 18.04±0.25        |
| Panda v. Seal          | 14.13±0.13        | <b>14.01±0.12</b> | 15.16±0.17       | 14.22±0.13        |
| Leopard v. Cat         | 12.08±0.11        | <b>11.77±0.09</b> | 11.79±0.08       | 11.82±0.09        |
| Leopard v. Pig         | <b>20.97±0.24</b> | 21.12±0.24        | 21.88±0.24       | 21.79±0.26        |
| Leopard v. Hippo.      | 16.10±0.14        | <b>15.89±0.13</b> | 16.36±0.13       | 16.27±0.14        |
| Leopard v. Whale       | 4.85±0.07         | <b>4.79±0.07</b>  | 4.95±0.08        | 4.89±0.07         |
| Leopard v. Raccoon     | 26.43±0.17        | <b>26.24±0.16</b> | 26.93±0.20       | 26.74±0.19        |
| Leopard v. Rat         | <b>17.62±0.20</b> | 17.75±0.21        | 18.78±0.25       | 18.00±0.23        |
| Leopard v. Seal        | 13.26±0.10        | <b>13.05±0.10</b> | 13.33±0.10       | 13.35±0.10        |
| Cat v. Pig             | 24.35±0.24        | <b>23.95±0.22</b> | 24.52±0.24       | 24.53±0.25        |
| Cat v. Hippo.          | 15.02±0.10        | <b>14.85±0.10</b> | 15.52±0.12       | 15.26±0.11        |
| Cat v. Whale           | 7.66±0.09         | 7.63±0.09         | 7.51±0.09        | <b>7.41±0.10</b>  |
| Cat v. Raccoon         | 15.54±0.11        | <b>15.35±0.10</b> | 15.80±0.10       | 15.71±0.13        |
| Cat v. Rat             | 34.96±0.30        | 34.30±0.30        | 34.83±0.32       | <b>34.07±0.32</b> |
| Cat v. Seal            | 18.79±0.14        | <b>18.58±0.13</b> | 18.97±0.14       | 18.85±0.13        |
| Pig v. Hippo.          | 27.57±0.27        | <b>27.27±0.27</b> | 27.75±0.25       | 27.72±0.27        |
| Pig v. Whale           | 8.37±0.15         | <b>8.22±0.16</b>  | 8.51±0.17        | 8.24±0.16         |
| Pig v. Raccoon         | 24.45±0.24        | <b>24.23±0.23</b> | 24.40±0.25       | 24.34±0.25        |
| Pig v. Rat             | 30.00±0.26        | <b>29.62±0.26</b> | 30.77±0.30       | 30.22±0.28        |
| Pig v. Seal            | 23.91±0.24        | <b>23.37±0.21</b> | 24.35±0.23       | 23.79±0.22        |
| Hippo. v. Whale        | 14.03±0.12        | <b>13.80±0.12</b> | 14.01±0.12       | 14.01±0.10        |
| Hippo. v. Raccoon      | 19.31±0.14        | <b>19.14±0.13</b> | 19.61±0.15       | 19.52±0.13        |
| Hippo. v. Rat          | <b>21.49±0.27</b> | 21.82±0.26        | 22.67±0.26       | 22.44±0.27        |
| Hippo. v. Seal         | 30.68±0.17        | <b>30.60±0.18</b> | 31.52±0.18       | 31.03±0.19        |
| Whale v. Raccoon       | 7.92±0.09         | 7.77±0.08         | <b>7.61±0.09</b> | 7.68±0.09         |
| Whale v. Rat           | <b>10.98±0.22</b> | 11.14±0.22        | 11.38±0.24       | 11.17±0.24        |
| Whale v. Seal          | 18.57±0.16        | <b>18.18±0.16</b> | 18.58±0.18       | 18.37±0.16        |
| Raccoon v. Rat         | <b>25.16±0.27</b> | 25.22±0.25        | 25.90±0.24       | 25.73±0.25        |
| Raccoon v. Seal        | 15.06±0.13        | <b>14.82±0.13</b> | 15.43±0.12       | 15.35±0.12        |
| Rat v. Seal            | 24.91±0.28        | <b>24.63±0.27</b> | 25.24±0.28       | 25.16±0.28        |
| <i>average ranking</i> | 2.09              | 1.40              | 3.71             | 2.80              |
| <i>average error</i>   | 17.60±0.10        | <b>17.47±0.10</b> | 18.21±0.11       | 17.80±0.10        |

Table 2: Error rate performance on the AwA dataset over 100 repeated experiments. **SURF** image features as the **original** domain and **attributes** as the **privileged** domain. The best methods for each binary task is highlighted in boldface.

|                        | GPC               | GPC+ (Ours)       | SVM               | SVM+             |
|------------------------|-------------------|-------------------|-------------------|------------------|
| Chimp. v. Panda        | 15.93±0.15        | <b>15.85±0.14</b> | 16.90±0.15        | 16.64±0.15       |
| Chimp. v. Leopard      | 14.74±0.13        | <b>14.72±0.12</b> | 15.28±0.15        | 15.18±0.12       |
| Chimp. v. Cat          | 16.63±0.12        | <b>16.51±0.11</b> | 17.34±0.11        | 17.08±0.10       |
| Chimp. v. Pig          | 19.82±0.23        | <b>19.50±0.26</b> | 20.52±0.27        | 20.34±0.24       |
| Chimp. v. Hippo.       | 18.99±0.11        | <b>18.68±0.11</b> | 19.57±0.11        | 19.36±0.11       |
| Chimp. v. Whale        | 5.72±0.08         | 5.79±0.08         | 6.22±0.11         | <b>5.63±0.08</b> |
| Chimp. v. Raccoon      | <b>19.60±0.13</b> | 19.66±0.13        | 20.03±0.14        | 20.13±0.13       |
| Chimp. v. Rat          | 19.94±0.27        | <b>19.82±0.26</b> | 21.53±0.30        | 20.22±0.28       |
| Chimp. v. Seal         | 14.10±0.12        | <b>14.03±0.12</b> | 14.94±0.12        | 14.57±0.15       |
| Panda v. Leopard       | <b>14.19±0.12</b> | 14.21±0.13        | 14.85±0.15        | 14.82±0.14       |
| Panda v. Cat           | <b>12.96±0.12</b> | 12.98±0.12        | 14.26±0.13        | 13.96±0.12       |
| Panda v. Pig           | 20.23±0.23        | <b>20.18±0.22</b> | 22.54±0.29        | 21.41±0.26       |
| Panda v. Hippo.        | 15.47±0.12        | <b>15.44±0.13</b> | 16.89±0.17        | 16.16±0.17       |
| Panda v. Whale         | <b>5.00±0.09</b>  | 5.20±0.09         | 5.73±0.11         | 5.06±0.08        |
| Panda v. Raccoon       | 17.03±0.13        | <b>17.02±0.13</b> | 18.37±0.18        | 18.06±0.15       |
| Panda v. Rat           | <b>17.09±0.24</b> | 17.26±0.23        | 20.06±0.30        | 18.37±0.25       |
| Panda v. Seal          | 14.13±0.13        | <b>13.99±0.13</b> | 15.16±0.17        | 14.82±0.15       |
| Leopard v. Cat         | 12.08±0.11        | 11.81±0.09        | <b>11.79±0.08</b> | 12.13±0.11       |
| Leopard v. Pig         | <b>20.97±0.24</b> | 21.11±0.24        | 21.88±0.24        | 22.03±0.29       |
| Leopard v. Hippo.      | 16.10±0.14        | <b>15.87±0.13</b> | 16.36±0.13        | 16.41±0.14       |
| Leopard v. Whale       | 4.85±0.07         | <b>4.78±0.07</b>  | 4.95±0.08         | 4.90±0.07        |
| Leopard v. Raccoon     | 26.43±0.17        | <b>26.27±0.17</b> | 26.93±0.20        | 27.31±0.19       |
| Leopard v. Rat         | <b>17.62±0.20</b> | 17.67±0.21        | 18.78±0.25        | 18.84±0.24       |
| Leopard v. Seal        | 13.26±0.10        | <b>13.04±0.10</b> | 13.33±0.10        | 13.38±0.10       |
| Cat v. Pig             | 24.35±0.24        | <b>24.01±0.23</b> | 24.52±0.24        | 24.68±0.25       |
| Cat v. Hippo.          | 15.02±0.10        | <b>14.87±0.10</b> | 15.52±0.12        | 15.47±0.11       |
| Cat v. Whale           | 7.66±0.09         | 7.63±0.09         | 7.51±0.09         | <b>7.48±0.09</b> |
| Cat v. Raccoon         | 15.54±0.11        | <b>15.32±0.10</b> | 15.80±0.10        | 15.78±0.10       |
| Cat v. Rat             | 34.96±0.30        | <b>34.42±0.29</b> | 34.83±0.32        | 34.79±0.28       |
| Cat v. Seal            | 18.79±0.14        | <b>18.60±0.13</b> | 18.97±0.14        | 19.25±0.16       |
| Pig v. Hippo.          | 27.57±0.27        | <b>27.36±0.26</b> | 27.75±0.25        | 28.17±0.26       |
| Pig v. Whale           | 8.37±0.15         | <b>8.24±0.16</b>  | 8.51±0.17         | 8.38±0.15        |
| Pig v. Raccoon         | 24.45±0.24        | <b>24.24±0.22</b> | 24.40±0.25        | 24.91±0.22       |
| Pig v. Rat             | 30.00±0.26        | <b>29.67±0.26</b> | 30.77±0.30        | 30.33±0.29       |
| Pig v. Seal            | 23.91±0.24        | <b>23.41±0.22</b> | 24.35±0.23        | 24.03±0.23       |
| Hippo. v. Whale        | 14.03±0.12        | <b>13.82±0.12</b> | 14.01±0.12        | 14.45±0.13       |
| Hippo. v. Raccoon      | 19.31±0.14        | <b>19.15±0.13</b> | 19.61±0.15        | 19.74±0.16       |
| Hippo. v. Rat          | <b>21.49±0.27</b> | 21.79±0.26        | 22.67±0.26        | 22.33±0.26       |
| Hippo. v. Seal         | 30.68±0.17        | <b>30.61±0.18</b> | 31.52±0.18        | 31.47±0.19       |
| Whale v. Raccoon       | 7.92±0.09         | 7.79±0.08         | <b>7.61±0.09</b>  | 7.66±0.08        |
| Whale v. Rat           | <b>10.98±0.22</b> | 11.16±0.22        | 11.38±0.24        | 11.17±0.22       |
| Whale v. Seal          | 18.57±0.16        | <b>18.28±0.16</b> | 18.58±0.18        | 18.99±0.18       |
| Raccoon v. Rat         | <b>25.16±0.27</b> | 25.21±0.25        | 25.90±0.24        | 26.12±0.26       |
| Raccoon v. Seal        | 15.06±0.13        | <b>14.85±0.12</b> | 15.43±0.12        | 15.42±0.13       |
| Rat v. Seal            | 24.91±0.28        | <b>24.64±0.26</b> | 25.24±0.28        | 25.14±0.27       |
| <i>average ranking</i> | 1.98              | 1.40              | 3.44              | 3.18             |
| <i>average error</i>   | 17.60±0.10        | <b>17.48±0.10</b> | 18.21±0.11        | 18.06±0.11       |
